# Supplementary material for: Long-term Immune Response to SARS-CoV-2 Infection Among Children and Adults After Mild Infection
Source: PubMed Central journal article supplement (PMC9280400; doi:10.1001/jamanetworkopen.2022.21616), 2022-07-13
Supplement: jamanetwopen-e2221616-s001.pdf [file jamanetwopen-e2221616-s001.pdf]

## Supplementary Online Content

Di Chiara C, Cantarutti A, Costenaro P, et al. Long-term immune response to SARS-CoV-2 infection among children and adults after mild infection. *JAMA Netw Open*. 2022;5(7):e2221616. doi:10.1001/jamanetworkopen.2022.21616

**eMethods.** Supplemental Methods

**eFigure 1.** Family Clusters of COVID-19 Observed From April 1st, 2020 to August 31st, 2021, at the COVID-19 Follow-up Clinic of Our Institution

**eFigure 2.** Criteria for the Definition of the Baseline Time for COVID-19 Cases

**eFigure 3.** Distribution of S-RBD IgG Samples According to Time of Collection and Age Classes (n=769)

**eFigure 4.** Distribution of S-RBD IgG Samples According to Age Classes

**eTable.** Demographic and Clinical Characteristics of the Analyzed Population, Overall (n=876) and Stratified by Familiar Status as Children or Older Siblings (n=446) and Parents (n=431)

**This supplementary material has been provided by the authors to give readers additional information about their work.**

## **eMethods.** Supplemental Methods

### **Serological assays**

Blood samples were collected in EDTA-coated tubes to further separate cells and plasma by Ficoll procedure. Plasma and cellular samples were appropriately store at -80°C and liquid nitrogen, respectively, until use.

In a subgroup of 172 samples (from 139 patients), a high-throughput method for Plaque Reduction Neutralizing Test (PRNT) was used for the quantification of neutralizing antibodies in plasma samples<sup>(1,2)</sup>. Samples were heat-inactivated by incubation at 56°C for 30 min and 2-fold dilutions were prepared in Dulbecco modified Eagle medium (DMEM). The dilutions, mixed to a 1:1 ratio with a virus solution containing approximately 25 focus-forming units (FFUs) of SARS-CoV-2, were incubated for 1 h at 37 °C. Fifty microliters of the virus-serum mixtures were added to confluent monolayers of Vero E6 cells, in 96-wells plates and incubated for 1 h at 37 °C, in a 5% CO<sub>2</sub> incubator. The inoculum was removed and 100 ml of overlay solution of Minimum essential medium (MEM), 2% fetal bovine serum (FBS), penicillin (100 U/ml), streptomycin (100 U/ml) and 0.8% carboxy methyl cellulose was added to each well. After a 26-h incubation, cells were fixed with a 4% paraformaldehyde (PFA) solution. Visualization of plaques was obtained with an immunocytochemical staining method using an anti-dsRNA monoclonal antibody (J2, 1:10,000; Sci- cons) for 1 hour, followed by 1 h incubation with peroxidase-labeled goat anti-mouse antibodies (1:1000; DAKO) and a 7 min incubation with the True Blue® (KPL) peroxidase substrate. FFUs were counted after acquisition of pictures on a flatbed scanner. Biosafety Level 3 laboratory setting was used for PRNT tests. The neutralization titer was defined as the reciprocal of the highest dilution resulting in a reduction of the control plaque count >50% (PRNT<sub>50</sub>). Samples recording titers equal to or above 1:10 were considered as positive according to a previous validation conducted on a panel of archived samples collected in 2018 in Italy<sup>(1)</sup>.

### **eReferences**

1. Padoan A, Bonfante F, Pagliari M, et al. Analytical and clinical performances of five immunoassays for the detection of SARS-CoV-2 antibodies in comparison with neutralization activity. *EBioMedicine*. 2020;62:103101. doi:10.1016/j.ebiom.2020.103101
2. Bonfante F, Costenaro P, Cantarutti A, et al. Mild SARS-CoV-2 Infections and Neutralizing Antibody Titers. *Pediatrics*. 2021;148(3):e2021052173. doi:10.1542/peds.2021-052173

**eFigure 1.** Family Clusters of COVID-19 Observed From April, 1st to August 31st, 2021, at the COVID-19 Follow-up Clinic of Our Institution

Blue: whole cohort of enrolled subjects; green: individuals excluded from the analysis; orange: confirmed COVID-19 cases.

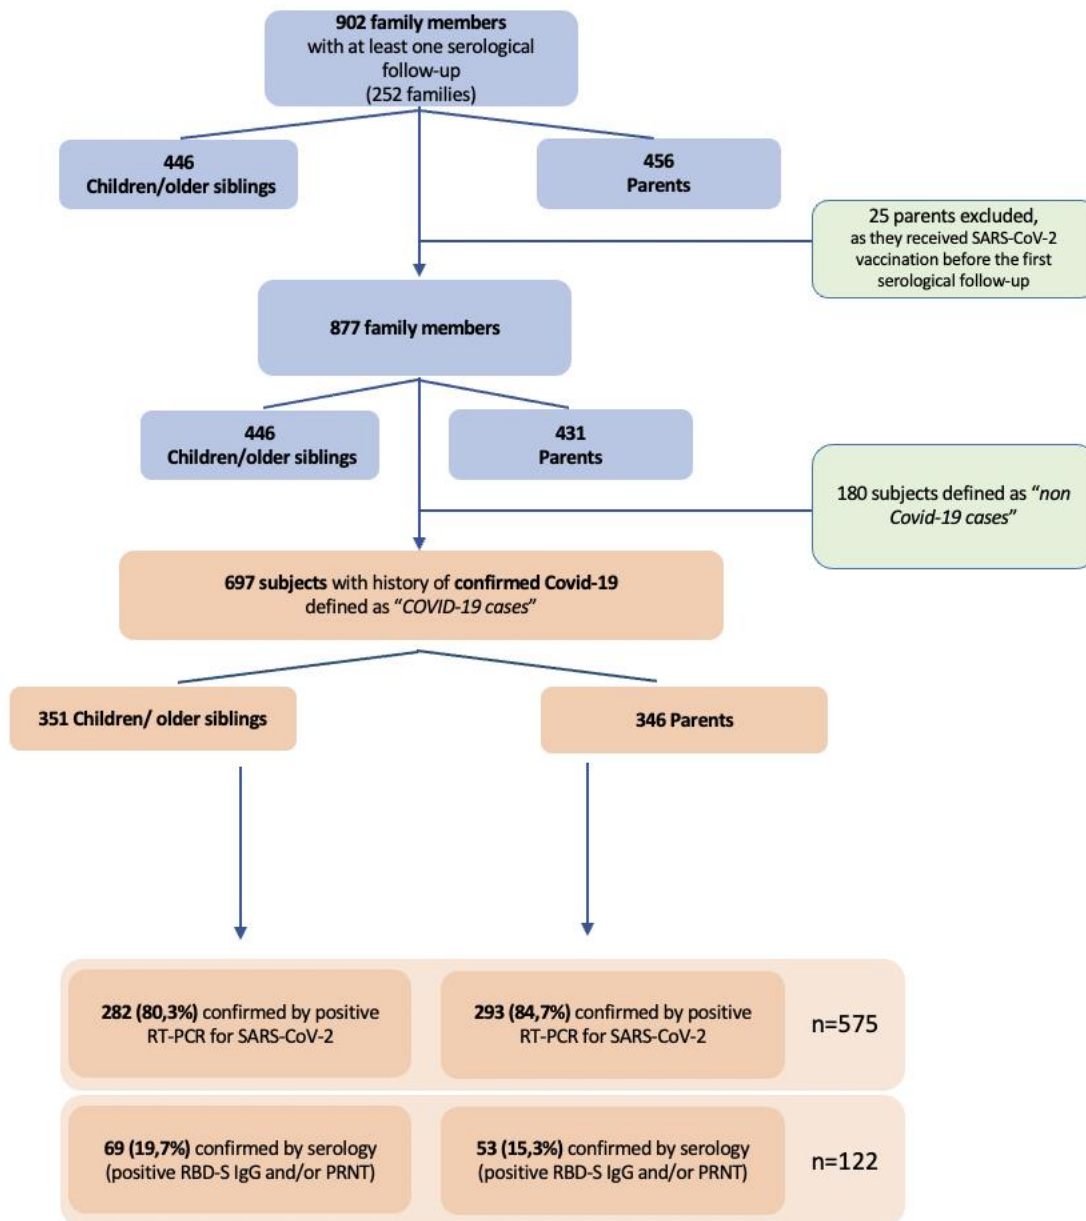

**eFigure 2.** Criteria for the Definition of the Baseline Time for COVID-19 Cases

For symptomatic cases the baseline of infection was defined as the onset of symptoms or the date of first positive SARS-CoV-2 molecular assay; while for asymptomatic cases as the date of the first positive molecular assay or by the family outbreak temporal sequence.

Only for 67 (9,6%) asymptomatic cases with negative or not performed NPs, but with evidence of SARS-CoV-2 seropositivity, the *baseline time* was identified as the symptoms' onset of the first symptomatic family member.

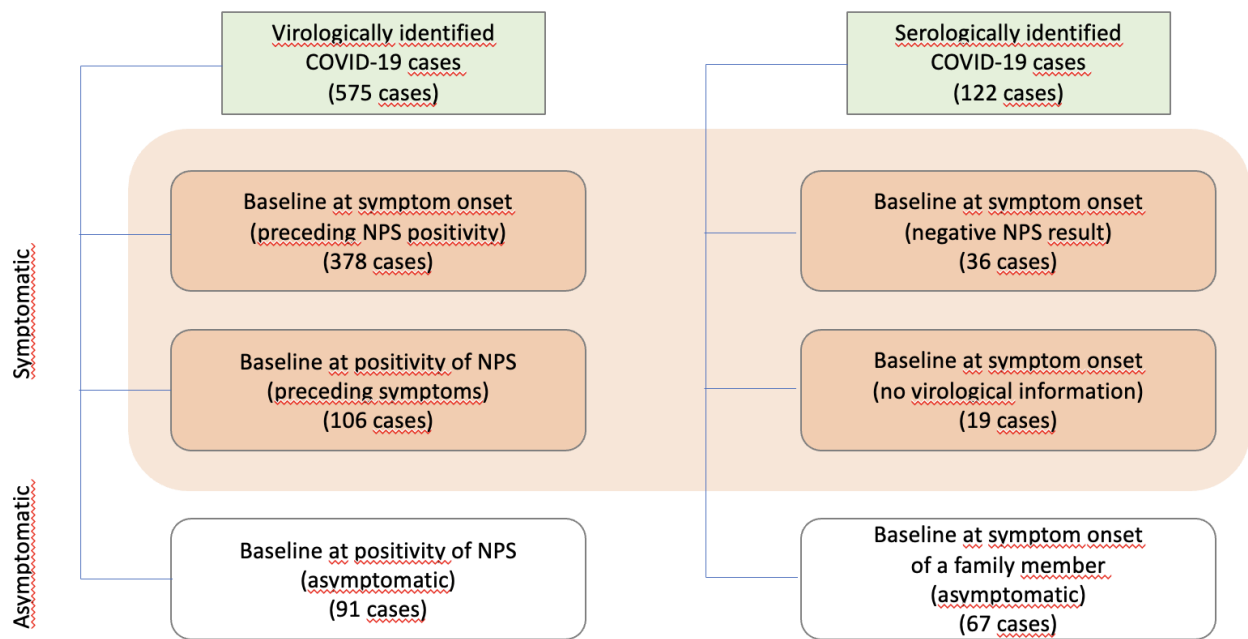

**Figure 3.** Distribution of S-RBD IgG Samples According to Time of Collection and Age Classes (n=769)

Younger patients presented higher levels of Abs across all time points of samples collection.

S-RBD IgG levels are reported in log<sub>2</sub> scales. The dotted lines at 4.33 kBAU/L correspond to the assay cut-off for discriminating positive from negative samples.

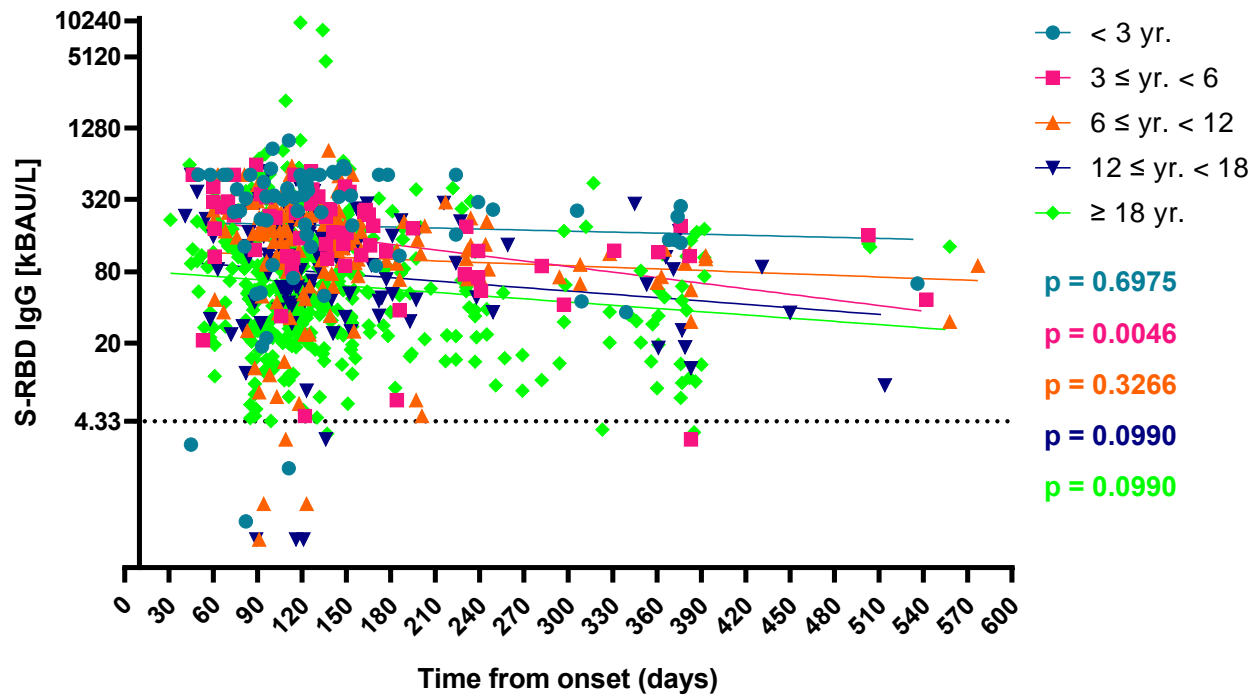

**Figure 4.** Distribution of S-RBD IgG Samples According to Age Classes

Younger children presented a significantly higher levels of Abs than adults.

S-RBD IgG levels are reported in log<sub>2</sub> scales. The dotted lines at 4.33 kBAU/L correspond to the assay cut-off for discriminating positive from negative samples.

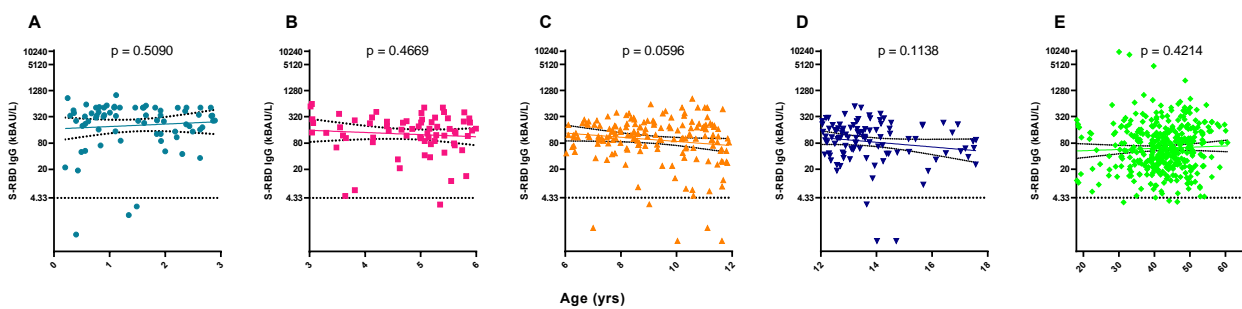

**eTable.** Demographic and Clinical Characteristics of the Analyzed Population, Overall (n=876) and Stratified by Familiar Status as Children or Older Siblings (n=446) and Parents (n=431)

|                            | OVERALL           |        |                   |        |           | CHILDREN/OLDER SIBLINGS |        |                   |        |           | PARENTS           |        |                   |        |           |
|----------------------------|-------------------|--------|-------------------|--------|-----------|-------------------------|--------|-------------------|--------|-----------|-------------------|--------|-------------------|--------|-----------|
|                            | COVID-19 negative |        | COVID-19 positive |        | p-value § | COVID-19 negative       |        | COVID-19 positive |        | p-value § | COVID-19 negative |        | COVID-19 positive |        | p-value § |
|                            | (n=179)           |        | (n=697)           |        |           | (n=94)                  |        | (n=351)           |        |           | (n=85)            |        | (n=346)           |        |           |
| <b>Female</b> (n, %)       | 83                | (46.4) | 321               | (46)   | 0.94      | 41                      | (43.6) | 155               | (44.2) | 0.93      | 42                | (49.4) | 166               | (48)   | 0.81      |
| <b>Age</b> (mean, SD)      | 27.1              | ±18.6  | 25.4              | ±18.0  | 0.28      | 10.4                    | ±5.9   | 8.6               | ±5.1   | 0.005     | 45.6              | ±6.1   | 42.5              | ±7.1   | 0.0003    |
| <b>Age classes</b> (n, %): |                   |        |                   |        |           |                         |        |                   |        |           |                   |        |                   |        |           |
| < 3 years                  | 4                 | (2.2)  | 55                | (8)    | 0.04      | 4                       | (4.3)  | 55                | (15.7) | 0.0002    | -                 | -      | -                 | -      | -         |
| 3 ≤ years < 6              | 19                | (10.6) | 47                | (6.7)  |           | 19                      | (20.2) | 47                | (13.4) |           | -                 | -      | -                 | -      |           |
| 6 ≤ years < 12             | 37                | (20.7) | 141               | (20.2) |           | 37                      | (39.4) | 141               | (40.2) |           | -                 | -      | -                 | -      |           |
| 12 ≤ years < 18            | 21                | (11.7) | 94                | (13.5) |           | 21                      | (22.3) | 94                | (26.8) |           | -                 | -      | -                 | -      |           |
| ≥ 18 years                 | 98                | (54.8) | 360               | (51.6) |           | 13                      | (13.8) | 14                | (4)    |           | 85                | (100)  | 346               | (100)  |           |
| <b>Symptomatic</b> (n, %): | 4                 | (2.2)  | 540               | (77.5) | <0.0001   | 2                       | (2.1)  | 241               | (68.7) | <0.0001   | 2                 | (2.3)  | 299               | (86.4) | <0.0001   |
| <b>WHO classification*</b> |                   |        |                   |        |           |                         |        |                   |        |           |                   |        |                   |        |           |
| (n, %):                    |                   |        |                   |        |           |                         |        |                   |        |           |                   |        |                   |        |           |
| Asymptomatic               | -                 | -      | 157               | (22.5) | -         | -                       | -      | 111               | (31.9) | -         | -                 | -      | 47                | (13.6) | -         |
| Mild                       | -                 | -      | 516               | (73.9) |           | -                       | -      | 231               | (65.3) |           | -                 | -      | 285               | (82.4) |           |
| Moderate / severe          | -                 | -      | 14                | (2)    |           | -                       | -      | 1                 | (0.3)  |           | -                 | -      | 13                | (3.8)  |           |
| Critical                   | -                 | -      | 1                 | (0.1)  |           | -                       | -      | 0                 | (0)    |           | -                 | -      | 1                 | (0.3)  |           |
| MIS-C                      | -                 | -      | 9                 | (1.3)  |           | -                       | -      | 9                 | (2.5)  |           | -                 | -      | 0                 | (0)    |           |
| <b>comorbidities:</b>      |                   |        |                   |        |           |                         |        |                   |        |           |                   |        |                   |        |           |
| No                         |                   |        |                   |        |           | 82                      | (87.2) | 290               | (82.6) | 0.28      | 72                | (84.7) | 286               | (82.4) |           |
| Yes**                      |                   |        |                   |        |           | 12                      | (12.8) | 59                | (17.4) |           | 13                | (15.3) | 61                | (17.6) |           |

§ T student test,  $\chi^2$  test, Fisher exact test where appropriate. \*WHO, World Health Organization; MIS-C, Multisystem Inflammatory Syndrome in Children. \*\*The following co-morbidities were found among 59 COVID-19 positive children: premature birth (n=6), asthma (n=15), allergy (n=6), congenital heart disease (n=6), rheumatological disease (n=3), neuro-epileptic disease (n=5), metabolic disease (n=1), kidney/ureteral disease (n=4), endocrinological disease (n=2), gastrointestinal disease (n=4).
